# Supplementary material for: Application of ionic liquids in the microwave-assisted extraction of podophyllotoxin from Chinese herbal medicine
Source: Royal Society of Chemistry journal article supplement (doi:10.1039/c0an00864h), 2011-01-01
Supplement: c0an00864h.pdf [file c0an00864h.pdf]

## SUPPLEMENTARY INFORMATION

**Table S1** Raw materials from different regions used in this experiment.

| Sample No. | Producing area      | Medical parts                  |                                      |                                |
|------------|---------------------|--------------------------------|--------------------------------------|--------------------------------|
|            |                     | <i>Dysosma<br/>versipellis</i> | <i>Sinopodophyllum<br/>hexandrum</i> | <i>Diphylleia<br/>sinensis</i> |
| 1          | Changsha, Hunan     | Root                           | Rhizome                              | Rhizome                        |
| 2          | Xiangtan, Hunan     | Root                           | Rhizome                              | Rhizome                        |
| 3          | Zhangjiajie, Hunan  | Root                           | Rhizome                              | Rhizome                        |
| 4          | Guilin, Guangxi     | Root                           | Rhizome                              | Rhizome                        |
| 5          | Yulin, Guangxi      | Root                           | Rhizome                              | Rhizome                        |
| 6          | Bozhou, Anhui       | Root                           | Rhizome                              | Rhizome                        |
| 7          | Shenzhen, Guangzhou | Root                           | Rhizome                              | Rhizome                        |
| 8          | Zhangshu, Jiangxi   | Root                           | Rhizome                              | Rhizome                        |
| 9          | Xi'an, Shanxi       | Root                           | Rhizome                              | Rhizome                        |
| 10         | Xianning, Hubei     | Root                           | Rhizome                              | Rhizome                        |

**Table S2** The chemical shifts of  $^1\text{H}$  NMR spectra for ionic liquids

| Ionic liquids <sup>a</sup> | $^1\text{H}$ NMR spectra ( $\delta$ , $\times 10^{-6}$ ) <sup>b</sup> |     |                                    |                                    |             |                                    |             |                                    |                                    |  |
|----------------------------|-----------------------------------------------------------------------|-----|------------------------------------|------------------------------------|-------------|------------------------------------|-------------|------------------------------------|------------------------------------|--|
|                            | 2-H                                                                   | 3-H | 4-H                                | 5-H                                | 6-H         | 7-H                                | 8-H         | 9-H                                | 10-H                               |  |
| [bmim]Cl                   | 10.31(s, 1H)                                                          | —   | 7.50(d, $J=2.0$<br><i>Hz</i> , 1H) | 7.60(d, $J=2.0$<br><i>Hz</i> , 1H) | 4.11(s, 3H) | 4.34(t, $J=7.2$<br><i>Hz</i> , 2H) | 1.89(m, 2H) | 1.3(q, $J=7.6$<br><i>Hz</i> , 2H)  | 0.95(t, $J=7.2$<br><i>Hz</i> , 3H) |  |
| [bmim]Br                   | 9.87(s, 1H)                                                           | —   | 7.40(d, $J=2.0$<br><i>Hz</i> , 1H) | 7.52(d, $J=2.0$<br><i>Hz</i> , 1H) | 3.91(s, 3H) | 4.14(t, $J=7.2$<br><i>Hz</i> , 2H) | 1.68(m, 2H) | 1.15(q, $J=7.6$<br><i>Hz</i> , 2H) | 0.73(t, $J=7.2$<br><i>Hz</i> , 3H) |  |
| [bmim]OTs                  | 10.18(s, 1H)                                                          | —   | 7.48(d, $J=1.2$<br><i>Hz</i> , 1H) | 7.60(d, $J=1.2$<br><i>Hz</i> , 1H) | 4.11(s, 3H) | 4.33(t, $J=7.2$<br><i>Hz</i> , 2H) | 1.90(m, 2H) | 1.37(q, $J=7.6$<br><i>Hz</i> , 2H) | 0.96(t, $J=7.2$<br><i>Hz</i> , 3H) |  |
| [bmim]OTM                  | 9.97(s, 1H)                                                           | —   | 7.35(d, $J=1.6$<br><i>Hz</i> , 1H) | 7.42(d, $J=1.6$<br><i>Hz</i> , 1H) | 4.09(s, 3H) | 4.31(t, $J=7.4$<br><i>Hz</i> , 2H) | 1.90(m, 2H) | 1.26(t, $J=7.2$<br><i>Hz</i> , 2H) | 0.97(t, $J=7.4$<br><i>Hz</i> , 3H) |  |
| [bmim][BF <sub>4</sub> ]   | 10.16(s, 1H)                                                          | —   | 7.55(d, $J=2.0$<br><i>Hz</i> , 1H) | 7.66(d, $J=2.0$<br><i>Hz</i> , 1H) | 4.13(s, 3H) | 4.35(t, $J=7.2$<br><i>Hz</i> , 2H) | 1.91(m, 2H) | 1.38(q, $J=7.6$<br><i>Hz</i> , 2H) | 0.96(t, $J=7.2$<br><i>Hz</i> , 3H) |  |

|                           |                |         |                       |                       |                       |                       |                       |                       |                       |
|---------------------------|----------------|---------|-----------------------|-----------------------|-----------------------|-----------------------|-----------------------|-----------------------|-----------------------|
|                           |                |         | <i>Hz, 1H)</i>        | <i>Hz, 1H)</i>        |                       | <i>Hz, 2H)</i>        |                       | <i>Hz, 2H)</i>        | <i>Hz, 3H)</i>        |
| [emim][BF <sub>4</sub> ]  | 10.16(s, 1H) _ |         | 7.46(d, <i>J</i> =2.0 | 7.58(d, <i>J</i> =2.0 | 4.10(s, 3H)           | 4.34(q, <i>J</i> =7.2 | 1.51(t, <i>J</i> =7.2 |                       |                       |
|                           |                |         | <i>Hz, 1H)</i>        | <i>Hz, 1H)</i>        |                       | <i>Hz, 2H)</i>        | <i>Hz, 3H)</i>        |                       |                       |
| [pmim][BF <sub>4</sub> ]  | 10.17(s, 1H) _ |         | 7.58(s, 1H)           | 7.66(s, 1H)           | 4.13(s, 3H)           | 4.32(t, <i>J</i> =7.2 | 1.98(m, 2H)           | 0.99(t, <i>J</i> =7.2 |                       |
|                           |                |         |                       |                       |                       | <i>Hz, 2H)</i>        | <i>Hz, 3H)</i>        |                       |                       |
| [hmim][BF <sub>4</sub> ]  | 9.96 (s, 1H) _ |         | 7.55(d, <i>J</i> =1.6 | 7.70(d, <i>J</i> =1.6 | 4.12(d, <i>J</i> =4.4 | 4.33(t, <i>J</i> =7.2 | 2.04(m, 2H)           | 1.32(m, 2H)           | 1.29(m, 2H)           |
|                           |                |         | <i>Hz, 1H)</i>        | <i>Hz, 1H)</i>        | <i>Hz, 3H)</i>        | <i>Hz, 2H)</i>        |                       |                       |                       |
| [omim][BF <sub>4</sub> ]  | 10.17(s, 1H) _ |         | 7.55(s, 1H)           | 7.72(s, 1H)           | 4.15(m, 3H)           | 4.36(m, 2H)           | 1.93(m, 2H)           | 1.27(m, 2H)           | 1.27(m, 2H)           |
| [demim][BF <sub>4</sub> ] | 10.24(s, 1H) _ |         | 7.42(d, <i>J</i> =2.0 | 7.58(d, <i>J</i> =2.0 | 4.13(s, 3H)           | 4.32(t, <i>J</i> =7.2 | 1.90(m, 2H)           | 1.29(m, 2H)           | 1.27(m, 2H)           |
|                           |                |         | <i>Hz, 1H)</i>        | <i>Hz, 1H)</i>        |                       | <i>Hz, 2H)</i>        |                       |                       |                       |
| [amim][BF <sub>4</sub> ]  | 9.20(s, 1H) _  |         | 7.39(d, <i>J</i> =2.0 | 7.29(d, <i>J</i> =2.0 | 3.92(m, 3H)           | 4.90(d, <i>J</i> =6.8 | 6.01(m, 1H)           | 5.49(m, 1H)           |                       |
|                           |                |         | <i>Hz, 1H)</i>        | <i>Hz, 1H)</i>        |                       | <i>Hz, 2H)</i>        |                       | 5.46(m, 1H)           |                       |
| [bpy][BF <sub>4</sub> ]   | 9.55(d,        | 8.20(d, | 8.58(m, 1H)           | 8.20(d, <i>J</i> =7.2 | 9.55(d, <i>J</i> =6.0 | 4.50(t, <i>J</i> =7.2 | 2.05(m, 2H)           | 1.43(m, 2H)           | 0.96(t, <i>J</i> =7.2 |

|                           | <i>J</i> =6.0<br>Hz, 1H) | <i>J</i> =7.2<br>Hz, 1H)         |             | Hz, 1H)                          | Hz, 1H)     | Hz, 2H)                          | Hz, 3H) |
|---------------------------|--------------------------|----------------------------------|-------------|----------------------------------|-------------|----------------------------------|---------|
|                           | 11-H                     | 12-H                             | 13-H        | 14-H                             | 15-H        | 16-H                             |         |
| [hmim][BF <sub>4</sub> ]  | 1.91(m, 2H)              | 0.87(t, <i>J</i> =6.4<br>Hz, 3H) |             |                                  |             |                                  |         |
| [omim][BF <sub>4</sub> ]  | 1.27(m, 2H)              | 1.27 (m, 2H)                     | 1.34(m, 2H) | 0.89(t, <i>J</i> =3.2<br>Hz, 3H) |             |                                  |         |
| [demim][BF <sub>4</sub> ] | 1.27(m, 2H)              | 1.27(m, 2H)                      | 1.32(m, 2H) | 1.25(m, 2H)                      | 1.33(m, 2H) | 0.88(t, <i>J</i> =7.2<br>Hz, 3H) |         |

<sup>a</sup> All of the ILs were dissolved in CDCl<sub>3</sub>. <sup>b</sup> <sup>1</sup>H NMR spectra were recorded at 100MHz and reported downfield from trimethylsilane (TMS). Peak shape were abbreviated as s=singlet, d=doublet, quart =quartet, t=triplet and m = multiplet.

**Table S3** The chemical shifts of  $^{13}\text{C}$  NMR spectra for ionic liquids

| Ionic liquids <sup>a</sup> | $^{13}\text{C}$ NMR spectra ( $\delta$ , $\times 10^{-6}$ ) <sup>b</sup> |     |        |        |       |       |       |       |       |       |       |       |       |       |       |  |
|----------------------------|--------------------------------------------------------------------------|-----|--------|--------|-------|-------|-------|-------|-------|-------|-------|-------|-------|-------|-------|--|
|                            | 2-C                                                                      | 3-C | 4-C    | 5-C    | 6-C   | 7-C   | 8-C   | 9-C   | 10-C  | 11-C  | 12-C  | 13-C  | 14-C  | 15-C  | 16-C  |  |
| [bmim]Cl                   | 137.28                                                                   |     | 121.79 | 123.53 | 36.34 | 49.47 | 31.91 | 19.20 | 13.23 |       |       |       |       |       |       |  |
| [bmim]Br                   | 137.05                                                                   |     | 121.93 | 123.57 | 36.63 | 49.69 | 32.00 | 19.30 | 13.32 |       |       |       |       |       |       |  |
| [bmim]OTs                  | 137.16                                                                   |     | 121.90 | 123.54 | 36.58 | 49.68 | 32.01 | 19.31 | 13.34 |       |       |       |       |       |       |  |
| [bmim]OTM                  | 137.22                                                                   |     | 121.85 | 123.56 | 36.60 | 49.68 | 32.00 | 19.30 | 13.33 |       |       |       |       |       |       |  |
| [bmim][BF <sub>4</sub> ]   | 137.02                                                                   |     | 121.95 | 123.56 | 36.56 | 49.67 | 31.98 | 19.28 | 13.29 |       |       |       |       |       |       |  |
| [emim][BF <sub>4</sub> ]   | 137.11                                                                   |     | 121.88 | 123.55 | 36.48 | 48.32 | 13.40 |       |       |       |       |       |       |       |       |  |
| [pmim][BF <sub>4</sub> ]   | 137.15                                                                   |     | 121.88 | 123.56 | 36.62 | 49.69 | 21.03 | 13.45 |       |       |       |       |       |       |       |  |
| [hmim][BF <sub>4</sub> ]   | 136.51                                                                   |     | 121.80 | 123.56 | 36.39 | 49.69 | 29.85 | 25.48 | 30.70 | 22.00 | 13.58 |       |       |       |       |  |
| [omim][BF <sub>4</sub> ]   | 136.76                                                                   |     | 121.80 | 123.57 | 36.41 | 49.77 | 29.98 | 25.89 | 28.68 | 28.60 | 31.32 | 22.23 | 13.73 |       |       |  |
| [demim][BF <sub>4</sub> ]  | 137.30                                                                   |     | 121.77 | 123.54 | 36.65 | 50.06 | 30.18 | 26.14 | 30.18 | 29.11 | 29.32 | 28.86 | 31.70 | 22.52 | 13.98 |  |

[amim][BF<sub>4</sub>] 138.03 121.98 123.62 36.67 53.12 133.1 115.5

[bpy][BF<sub>4</sub>] 145.15 128.42 145.02 128.42 145.15 61.65 33.68 19.19 13.41

<sup>a</sup> All of the ILs were dissolved in CDCl<sub>3</sub>. <sup>b</sup> <sup>13</sup>C NMR spectra were recorded at 400MHz and reported downfield from trimethylsilane (TMS)

---

**Table S4** ANOVA table for the (a)*Dyosma versipellis*, (b)*Sinopodophyllum hexandrum* and (c)*Diphylleia sinensis*.

| Source                               | Sum Sq | df | Mean Sq | F-value | Significance <sup>a</sup> |
|--------------------------------------|--------|----|---------|---------|---------------------------|
| <i>(a) Dyosma versipellis</i>        |        |    |         |         |                           |
| ILs concentration                    | 123.3  | 2  | 61.60   | 57.60   | *                         |
| Solid/liquid ratio                   | 648.2  | 2  | 324.1   | 302.9   | **                        |
| Temperature                          | 2.100  | 2  | 1.100   | 1.100   |                           |
| Irradiation time                     | 3.100  | 2  | 1.600   | 1.500   |                           |
| Error <sup>b</sup>                   | 2.100  | 2  | 1.100   |         |                           |
| <i>(b) Sinopodophyllum hexandrum</i> |        |    |         |         |                           |
| ILs concentration                    | 576.1  | 2  | 288.1   | 5.600   |                           |
| Solid/liquid ratio                   | 904.4  | 2  | 452.2   | 9.800   | -                         |
| Temperature                          | 233.1  | 2  | 116.6   | 2.300   |                           |
| Irradiation time                     | 102.9  | 2  | 51.50   | 1.000   |                           |
| Error                                | 102.9  | 2  | 51.50   |         |                           |
| <i>(c) Diphylleia sinensis</i>       |        |    |         |         |                           |
| ILs concentration                    | 25.40  | 2  | 12.70   | 9.500   | -                         |
| Solid/liquid ratio                   | 3248   | 2  | 1624    | 1212    | **                        |
| Temperature                          | 54.50  | 2  | 27.30   | 20.40   | *                         |
| Irradiation time                     | 2.700  | 2  | 1.300   | 1.000   |                           |
| Error                                | 2.700  | 2  | 1.300   |         |                           |

<sup>a</sup> The critical F-value is 99.01 (P<0.01, \*\*), 19.00 (P<0.05, \*) and 9.00 (P<0.1, -). <sup>b</sup>

The factor with minimum R value was selected as error term.

**Table S5** Infrared absorption data of different components in *Dyosma versipellis*,  
*Sinopodophyllum hexandrum* and *Diphylleia sinensis*.

| Chemical Compositions                   | Wavenumber (cm <sup>-1</sup> )                                                                        |
|-----------------------------------------|-------------------------------------------------------------------------------------------------------|
| Podophyllotoxin <sup>a</sup>            | 3460 (O-H), 1774 (C=O), 1590, 1480 (Ar-H), 1250, 1130,<br>1040 (C-O-C), 930 (OCH <sub>2</sub> O)      |
| Deoxypodophyllotoxin <sup>a</sup>       | 1760 (C=O), 1590, 1500 (Ar-H), 1240, 1125 (C-O-C), 930<br>(OCH <sub>2</sub> O)                        |
| Isopicropodophyllone <sup>a</sup>       | 1773, 1685 (C=O), 1593, 1480 (Ar-H), 1270, 1130, 1040<br>(C-O-C), 935 (OCH <sub>2</sub> O)            |
| Dehydropodophyllotoxin <sup>a</sup>     | 1705 (C=O), 1590, 1465 (Ar-H), 1240, 1130, 1045<br>(C-O-C), 940 (OCH <sub>2</sub> O)                  |
| β-peltatin <sup>c</sup>                 | 3500~3200 (O-H), 1760 (C=O), 1630, 1590, 1500 (Ar-H),<br>1250, 1130 (C-O-C), 930 (OCH <sub>2</sub> O) |
| Diphyllin <sup>d</sup>                  | 1230, 1130, 1040 (C-O-C), 930 (OCH <sub>2</sub> O)                                                    |
| Picropodophyllin <sup>a</sup>           | 3445 (O-H), 1770 (C=O), 1593, 1480 (Ar-H), 1250, 1130,<br>1040 (C-O-C), 930 (OCH <sub>2</sub> O)      |
| Podophyllotoxone <sup>a</sup>           | 1780, 1668 (C=O), 1590, 1480 (Ar-H), 1250, 1130, 1035<br>(C-O-C), 930 (OCH <sub>2</sub> O)            |
| 4'-demethylpodophyllotoxin <sup>b</sup> | 3505, 3480 (O-H), 1765 (C=O), 1620, 1490 (Ar-H), 1250,<br>1040 (C-O-C), 930 (OCH <sub>2</sub> O)      |
| Kaempferol <sup>b</sup>                 | 3357 (O-H), 1655 (C=O), 1605, 1508 (Ar-H or Ar (C=C)),<br>1310, 1105 (C-O-C), 792 (Ar-H, δ)           |



|                                               |                                                                                                              |
|-----------------------------------------------|--------------------------------------------------------------------------------------------------------------|
| Quercetin <sup>b</sup>                        | 3362, 3226 (O-H), 1653 (C=O), 1602, 1570 (Ar-H or Ar (C=C)), 1331 (C-O-C), 794, 739 (Ar-H, $\delta$ )        |
| Vanillic acid <sup>b</sup>                    | 3585 (O-H), 1753 (C=O), 1600, 1514 (Ar(C=C)), 1272, 1156 (C-O), 765 (=C-H, $\delta$ )                        |
| $\beta$ -sitosterol <sup>b</sup>              | 3350 (O-H), 2944, 2872 (C-H), 1465, 1378 (C-H, $\delta$ ), 1058 (C-O)                                        |
| 4'-demethyldeoxy podophyllotoxin <sup>e</sup> | 3400 (O-H), 1758 (C=O), 1610, 1500 (Ar-H), 1220, 1030 (C-O-C), 925 (OCH <sub>2</sub> O)                      |
| 8-isopentenyl kaempferol <sup>e</sup>         | 3360 (O-H), 2920 (=C-H), 1650 (C=O), 1610, 1505 (Ar-H or Ar(C=C))                                            |
| Citrusinol <sup>e</sup>                       | 3360 (O-H), 2910, 1610, 1535                                                                                 |
| 4'-demethylpodophyllone <sup>e</sup>          | 3600~3400 (O-H), 1765 (C=O), 1612, 1520 (Ar(C=C)), 1505 (Ar-H), 1240, 1110 (C-O-C), 930 (OCH <sub>2</sub> O) |
| Hexacosanoic acid <sup>a</sup>                | 3600~3200 (O-H), 2910 (C-H), 2800 (C-H), 1710 (C=O)                                                          |

<sup>a</sup> Common component of three herbs. <sup>b</sup> Mutual component of *Dysosma versipellis* and *Sinopodophyllum hexandrum*. <sup>c</sup> Specific component of *Dysosma versipellis*. <sup>d</sup> Mutual component of *Dysosma versipellis* and *Diphylleia sinensis*. <sup>e</sup> Specific component of *Sinopodophyllum hexandrum*.

---

Synthetic Routes 1 (Quaternization)

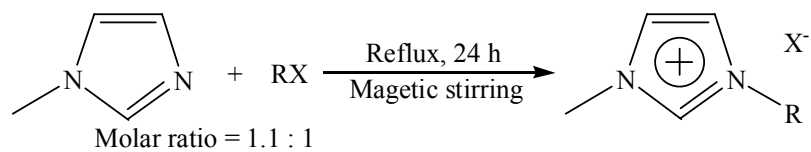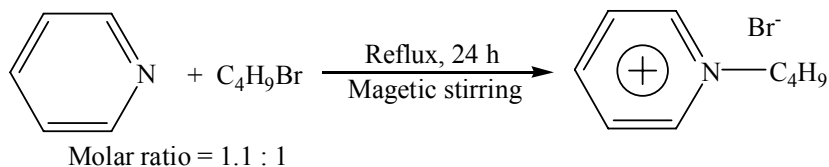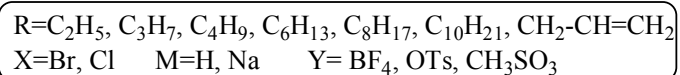

Synthetic Routes 2 (Metathesis)

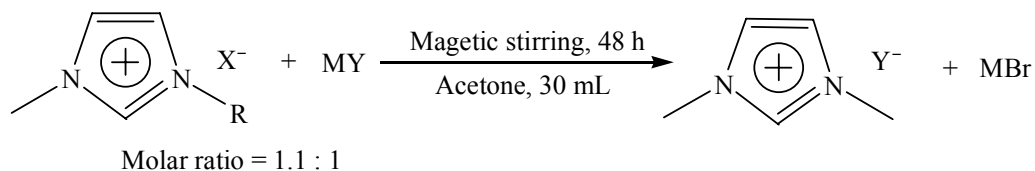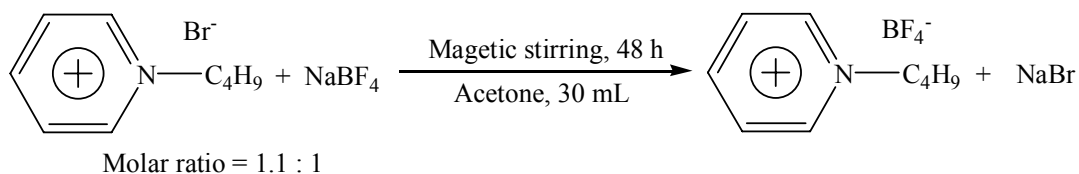

**Fig. S1** Synthetic routes of ILs

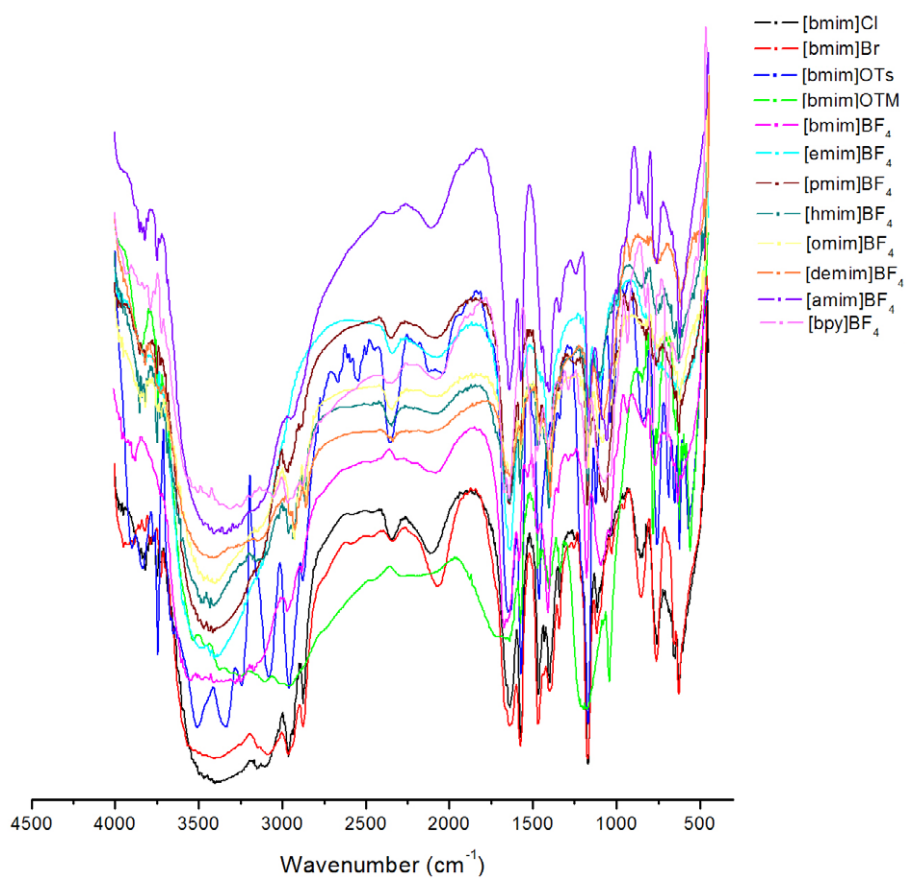

**Fig. S2** FT-IR spectra of synthetic ILs
